# Supplementary material
Source: PubMed Central journal article supplement (PMC3191017)

## Supplementary Figures.

**Supplementary Fig. 1.** SODD interaction with 5-ptases. A. HEK293 cells expressing GST-SKIP or GST were serum-starved or EGF-stimulated (100 ng/mL, 10 min). NP-40-soluble fractions were incubated with glutathione Sepharose and washed extensively. Bound proteins eluted in SDS-PAGE sample buffer (*upper two panels*) or NP-40-soluble input fractions (*lower panel*) were subjected to Western blot analysis with GST or SODD antibodies. B. NP-40-soluble fractions derived from COS-7 cells co-expressing FLAG-SODD and Xpress-OCRL (and the vector alone controls as indicated), were immunoprecipitated with FLAG antibodies (*upper two panels*) and immunoblotted with FLAG or Xpress antibodies. Input soluble fractions were also immunoblotted with FLAG or Xpress antibodies (*lower two panels*).

**Supplementary Fig. 2.** SODD's regulation of SHIP2 PI(3,4,5)P<sub>3</sub> 5-ptase activity. COS-7 cells transiently transfected with FLAG-SODD and HA-SHIP2 or vector controls were lysed and immunoprecipitated with HA antibodies and either subjected to PI([<sup>32</sup>P]3,4,5)P<sub>3</sub> 5-ptase assay and the reaction products analysed by TLC (*upper panel*) or immunoblotted with FLAG (*middle panel*) or HA (*lower panel*) antibodies. The migration of PI([<sup>32</sup>P]3,4,5)P<sub>3</sub> and PI([<sup>32</sup>P]3,4)P<sub>2</sub> lipids are shown on the right. B. The level of PI([<sup>32</sup>P]3,4)P<sub>2</sub> formed was determined by densitometry, and represented relative to that detected in HA immunoprecipitates derived from HA-SHIP2 and FLAG expressing cells (arbitrarily set as 1). Bars represent the mean ± SEM of three independent experiments.

**Supplementary Fig. 3.** Akt signalling and apoptosis induction in <sup>-/-</sup>SODD MEFs. A. RIPA buffer-soluble lysates from spontaneously immortalised <sup>+/+</sup>SODD or <sup>-/-</sup>MEFs were immunoblotted with SODD, SKIP, SHIP2, PTEN, or β-tubulin (total protein loading control) antibodies as indicated. B. Spontaneously immortalised <sup>+/+</sup>SODD or <sup>-/-</sup>MEFs were serum-starved and stimulated with EGF (20 ng/ml). Detergent soluble lysates (50 μg) were immunoblotted with antibodies specific for either phospho-Akt-Ser<sup>473</sup> (*upper panel*) or β-tubulin (*lower panel*). C. Spontaneously immortalised <sup>+/+</sup>SODD or <sup>-/-</sup>MEFs were treated as in (B) and the level of phospho-Akt-Ser<sup>473</sup> was determined by densitometry, standardised to β-tubulin loading control, and represented as a relative value to that detected in <sup>+/+</sup>SODD lysates (arbitrarily set as 1), for each time point. Bars represent the mean ± SEM of three independent experiments (\*p<0.05). D. Spontaneously immortalised <sup>+/+</sup>SODD or <sup>-/-</sup> MEFs cultured in serum-containing medium were seeded into 8 chamber slides and treated with either agonistic Fas antibody (1 mg/ml) or staurosporine (1 mM) for 8 hours, then subjected to TUNEL assays and examined by confocal microscopy. Quantitative analysis of the level of apoptosis following apoptotic induction was performed by calculating the number of TUNEL-positive nuclei relative to the total number of nuclei in 10 random fields. Bars represent the mean ± SEM of three independent experiments.

# SUPPLEMENTARY FIG 1

**A**

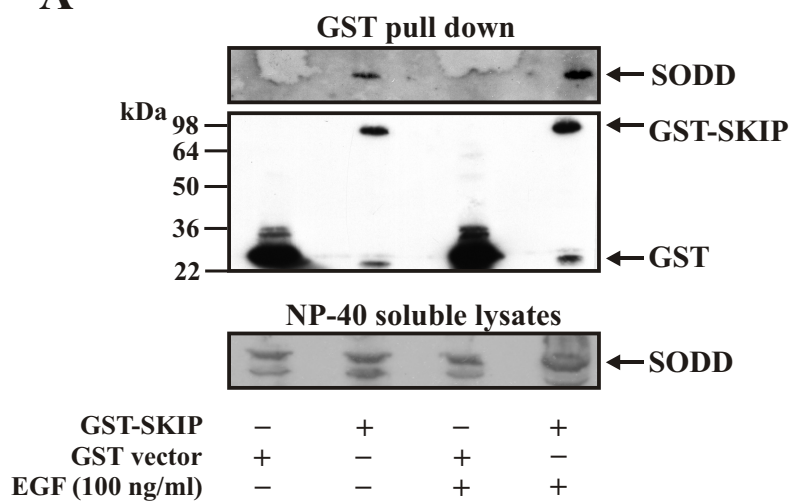

**B**

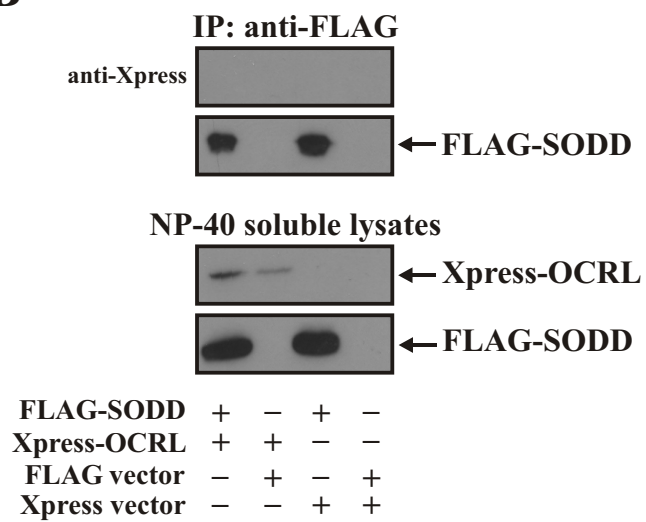

## SUPPLEMENTARY FIG 2

**A**

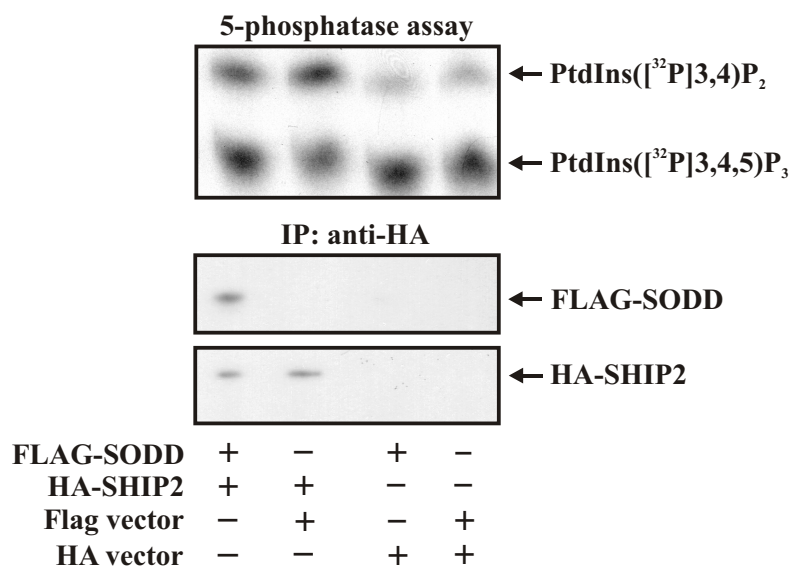

**B**

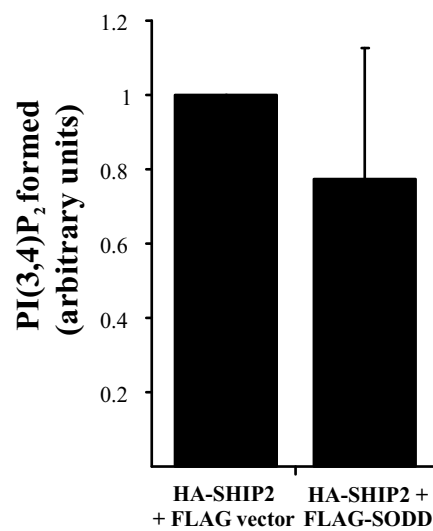

# SUPPLEMENTARY FIG 3

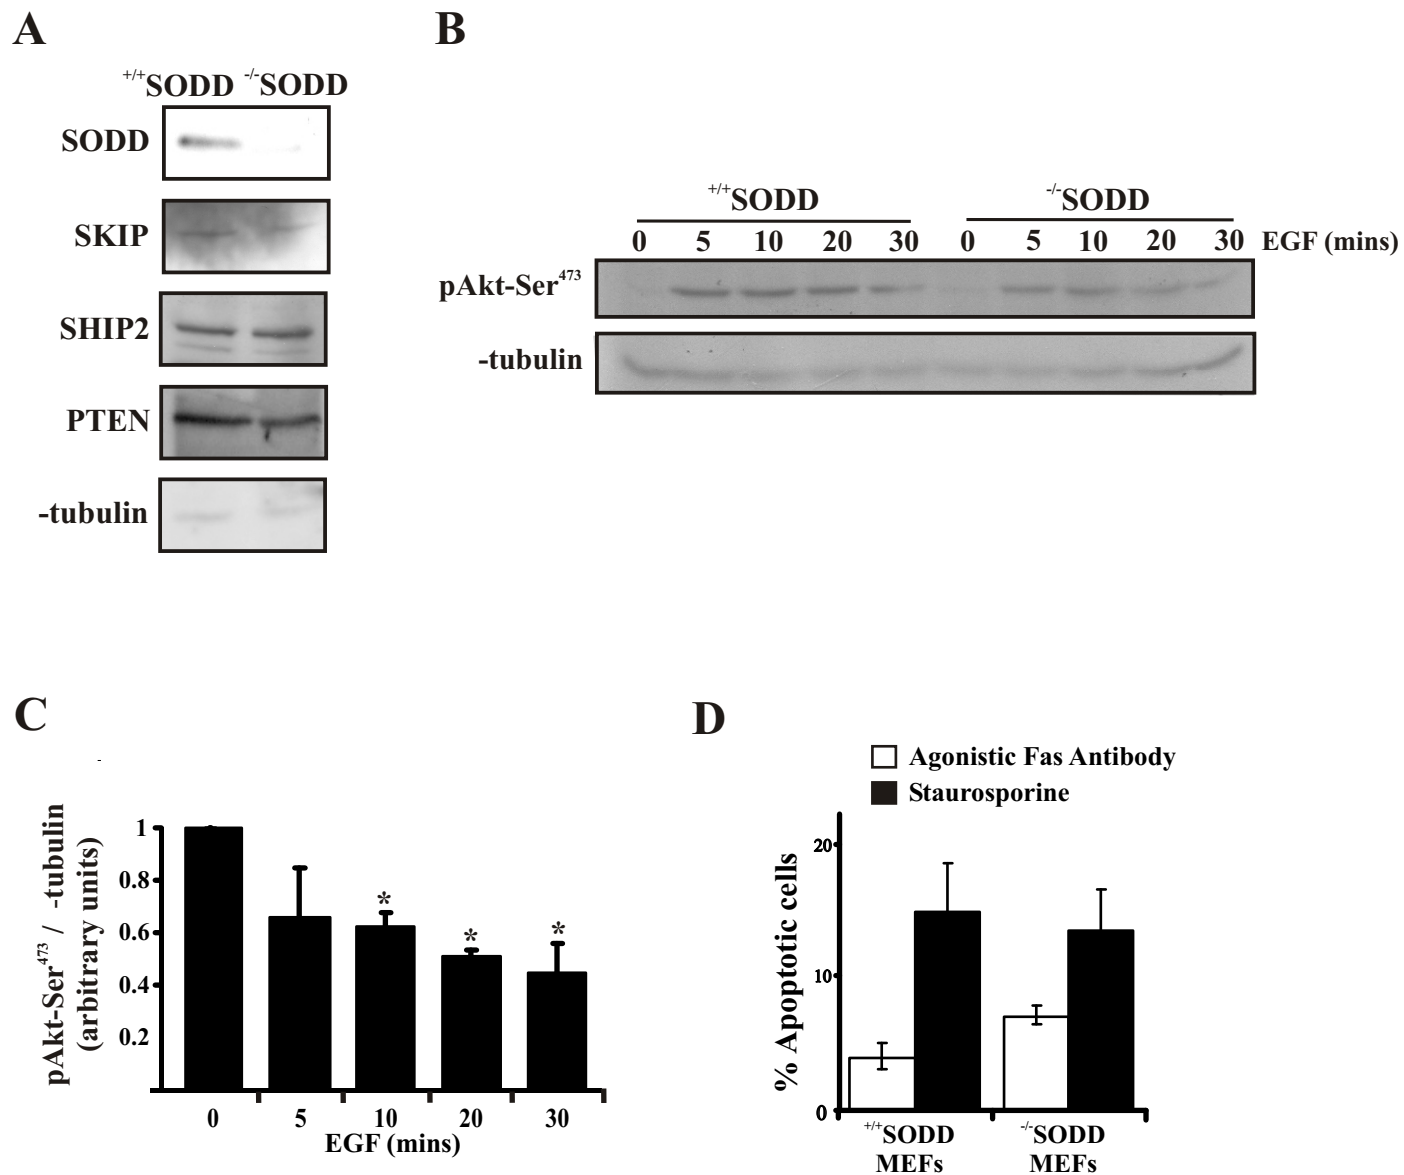

Supplement: supp_M111.263103_jbc.M111.263103-1.pdf [file supp_M111.263103_jbc.M111.263103-1.pdf]
